# Titration of *in-cellula* affinities of protein-protein interactions

David Cluet, Blandine Vergier, Nicolas-Pierre Levy, Lucie Dehau, Alexandre Thurman, Ikram Amri and Martin Spichty<sup>#</sup>

Laboratoire de Biologie et de Modélisation de la Cellule, Ecole Normale Supérieure de Lyon, CNRS, Université Lyon 1, Université de Lyon; 46 allée d'Italie; 69364 Lyon cedex 07; France.

<sup>#</sup>) corresponding author. New address: Laboratoire d'Innovation Moléculaire et Applications, Université de Strasbourg – Centre National de la Recherche Scientifique – Université de Haute-Alsace, 3 bis rue Alfred Werner, 68057 Mulhouse Cedex, France; Phone: +33 389 33 68 62; Email: martin.spichty@uha.fr.

**KEYWORDS:** protein-protein interactions, quantitative yeast-two hybrid, flow cytometry, single-cell analysis.

**A genetic assay permits simultaneous quantification of two interacting proteins and their bound fraction at the single-cell level using flow cytometry. *In-cellula* affinities of protein-protein interactions can be extracted from the acquired data through a titration-like analysis. The applicability of this approach is demonstrated on a diverse set of interactions with proteins from different families and organisms and with *in-vitro* dissociation constants ranging from picomolar to micromolar.**

The quest for methods that permit rapid and reliable determination of the affinity of protein-protein interactions (PPI) is unbroken. In contrast to biochemical *in-vitro* methods such as Isothermal Titration Calorimetry (ITC) and Surface Plasmon Resonance (SPR) that require purified proteins, quantitative genetic assays rely on the expression of the proteins of interest in cells. Many of these assays<sup>1-5</sup> are inspired by the yeast two-hybrid (Y2H) technique<sup>6</sup> which is based on the *in-cellula* expression of two proteins, usually named Bait and Prey, fused to an DNA-binding domain (BD) and an activation domain (AD), respectively. Upon physical interaction of the BD-Bait and AD-Prey proteins, a functional transcription factor is reconstituted that drives the expression of a reporter gene. The stronger the interaction, the higher should be the expression level of the reporter.<sup>7</sup> However, the expression level of the AD-Bait and BD-Prey play an important role, too.<sup>8</sup>

We recently introduced a quantitative yeast-two hybrid system (qY2H) that permits for the first time simultaneous quantification of BD-Bait, AD-Prey and the reporter at the single-cell level without the need of any antibodies or purified proteins.<sup>8</sup> Instead, we take advantage of fluorescent fusion proteins (Fig. 1A) that can be detected by standard flow cytometers. Here we show how this qY2H method can be exploited to perform *in-cellula* affinity titrations by applying the following two important improvements:

- 1) Cellular contents of fluorescent proteins are determined in units of Molecules of Equivalent Soluble Fluorochrome (MESF), so that measured quantities become independent of

the applied apparatus setup. It facilitates the future transferability of the qY2H measurements to other flow cytometers and allows researchers to consistently compare their results. Our reference fluorochrome is the yeast Enhanced Green Fluorescent protein (yEGFP) for which commercial calibration beads exist. The fluorescence intensity of TagRFP is converted into units of MESF of EGFP using independent calibration experiments with a fluorescent tandem protein BD-TagRFP-EGFP (see “Methods”).

2) We analyze the data by a titration-like procedure which allows the straightforward extraction of *in-cellula* dissociation constants for Bait:Prey interactions. In a proof of concept, we apply this *in-cellula* titration approach to a diverse set of PPIs with dissociation constants ranging from 117 pM to 17  $\mu$ M (Table 1). As in *in-vitro* SPR experiments, each PPI can be measured by Y2H in two different orientations (by exchanging Bait and Prey). Here we study only the orientation that produced the higher reporter level.<sup>8</sup> This orientation is considered as the molecular configuration with the higher accessibility of the PPI binding interface.<sup>7</sup>

In our qYH2 experiments, diploid yeast cells with constitutive expression of BD-Bait and induced expression of AD-Prey are cultured for two hours. Then, their fluorescence intensity is measured by flow cytometer in the three channels corresponding to TagRFP (BD-Bait), EGFP (AD-Prey), and TagBFP (reporter). Due to phenotypic variations, BD-Bait and AD-Prey are expressed at different levels among these cells which can be exploited to “prepare samples” for a titration. By gating, we can split the global heterogeneous ensemble of cells into several homogenous subensembles (bins). Each bin contains only cells within two specific, narrow intervals of red and green fluorescence intensity centered at values  $R$  and  $G$ , respectively. Assuming a linear relationship between fluorescence intensity and molecule numbers,  $R$  and  $G$  can be considered as measures for the mean cellular content of BD-Bait and AD-Prey in the corresponding bin.

With the mean value of the blue fluorescence intensity, we can calculate for each bin

the normalized reporter level  $\varphi$ . It is obtained by forming the ratio of the expression level for the interaction of interest,  $E_{\text{interaction}}$  (Fig. 1A) and the level for a covalent BD-AD fusion,  $E_{\text{covalent}}$  (Fig. 1B). This normalization renders  $\varphi$  dimensionless and independent of the acquisition apparatus (assuming again a linear relationship between molecule number and fluorescence intensity). Most importantly, we consider that  $\varphi$  reflects the time-averaged fraction of BD-Bait bound by AD-Prey during the reaction (as explained in the caption of Fig. 1). Thus, titration curves can be obtained when  $\varphi$  is plotted as a function of  $G$  while keeping  $R$  fixed (Fig. 1C). The curves can be fitted with the following Langmuir-type equation:

$$\varphi(G) \cong \beta \frac{G/\alpha}{K'_d + R + G/\alpha}$$

Eq. 1

where  $K'_d$  is the *in-cellula* dissociation constant (in units of MESF of EGFP) and  $\alpha$  and  $\beta$  are dimensionless parameters that empirically account for the fact that  $\varphi$  is a time-integrated property. The parameter  $\alpha$  reduces the final cellular content of AD-Prey (measured at the end of the reaction,  $G$ ) to the time-averaged content (over the entire reaction course,  $\langle G \rangle$ ). Since the induction kinetics under the GAL1-promotor in yeast<sup>9</sup> displays a quadratic-like time dependence (for short induction times), a reasonable choice for  $\alpha$  is  $3 [\langle G \rangle = \int_0^1 G t^2 dt = G/3]$ . The prefactor  $\beta$ , on the other hand, integrates differences in the expression kinetics of the reporter for  $E_{\text{interaction}}$  (induced expression) and  $E_{\text{covalent}}$  (constitutive expression). It can be determined experimentally by monitoring  $\varphi$  for  $G \rightarrow \infty$  using a high-affinity couple (such as BD-Barstar29F/AD-BarnaseH102A).

We recommend that the titrations are carried out with the lowest possible value of  $R=R_{\text{min}}$  (as defined by the detection limit of TagRFP by flow cytometry, see “Methods”). It limits overexpression and associated protein burden effects.<sup>10</sup> Furthermore, the auto-activation potential of the BD-Bait fusion is kept at a minimum, too.<sup>11</sup> Also, it mimics the condition of *in-*

*vitro* affinity titration experiments where the concentration of the titrated species (here BD-Bait) is kept fixed and as low as possible to avoid saturation effects. For the titrations with  $R=R_{\min}$  the parameters  $\alpha=3$  and  $\beta=1.35$  were used to extract the  $K_d$ -values.

Despite substantial differences between our *in-cellula* system and *in-vitro* setups (as previously discussed<sup>8</sup> in detail), the *in-cellula* affinities strongly correlate with those from *in-vitro* measurements ( $R^2=0.91$ , Fig. 1D). The slope of the regression line is 0.84. Other *in-cellula* assays usually find lower correlation coefficients ( $< 0.9$ ) and significantly lower values for the slope of the regression line (0.2-0.6).<sup>1-5</sup> This is even more remarkable if one considers that the tested set of PPIs in this work is significantly more diverse. It may indicate a higher sensitivity for the qY2H titration approach; more testing will be necessary to confirm this surmise.

The presented protocol is robust as witnessed by the small error bars in the titration curves (Fig. 1c). All steps of the protocol have been optimized in liquid phase that can be easily automated for the use of microplates and integrated within robotic pipelines. It sets the stage for high-throughput affinity screenings of PPIs using cross-mating approaches<sup>12</sup> with libraries of yeast clones. As an outlook, affinity-based networks<sup>13</sup> can be created by attributing weights to the PPI edges according to their effective affinities. It contrasts standard Y2H screens that yield networks with only binary information (YES or NO). The topology of edge-weighted networks may help identifying key pathways within the network, and how they change as a function of environmental conditions (stress, metabolism, *etc*). Thus, we anticipate that high-throughput qY2H affinity data would boost the modelling of interactomes and thereby advance significantly systems biology.

## Methods

The qY2H experiments, acquisitions by flow cytometry and analyses were carried out as described in our previous study<sup>8</sup> with the following particularities. About  $10^7$  cells were cultured per experiment and interaction (including the covalent BD-AD fusion and the control

sample BD-Empty / AD-Empty). To ensure that these cells have been indeed transfected with all three vectors, we selected for the analysis large (=growing) cells with a forward scatter range  $75\,000 < \text{FSC-H} < 125\,000$ ; “H” indicates signal height. Furthermore, only cells with a red fluorescence intensity of  $800 \pm 100$  TagRFP-H were analysed. This bin is located just above the 95% threshold of the non-fluorescent cells,<sup>8</sup> and therefore defines  $R_{\min}$ .

The mean Tag BFP-H value was then calculated for bins of varying  $G$  values from -500 to 25500 yEGFP-H (bin size 1000). For each bin we calculated:

$$\varphi(G) = \frac{\langle F_{\text{BFP,interaction}} \rangle_G - \langle F_{\text{BFP,CTRL}} \rangle_G}{\langle F_{\text{BFP,covalent}} \rangle_G - \langle F_{\text{BFP,CTRL}} \rangle_G}$$

Eq. 2

where  $\langle F_{\text{BFP,X}} \rangle_G$  is the mean blue fluorescence intensity. The subscripted X refers to the physical interaction, covalent fusion or control couple. The control couple BD-Empty / AD-Empty<sup>8</sup> permits to remove the background of the reporter system.

Finally,  $G$  values were converted into MESF of EGFP using calibration beads (Ozyme, reference 632594) following the manufacturer’s protocol. For the conversion of  $R_{\min}$ , we performed independent calibration measurements with diploid yeast cells expressing the fluorescent tandem fusion protein BD-TagRFP-yEGFP (under the same condition as the qY2H experiments). Cells with a red fluorescence intensity of  $800 \pm 100$  TagRFP-H displayed a mean green fluorescence intensity of 370 000 MESF of EGFP ( $=R_{\min}$  used in Eq. 1).

Experiments and analyses were performed at least three times for each interaction and averaged titration curves were least-square fitted with Eq. 1.

..

## Figures & Tables

**Table 1: Investigated protein-protein interactions and their *in-vitro* affinities ( $K_d$ ).**

| Bait proteins                |                           |          |              |    |                                             | Prey proteins |                              |                            |          |            |        |
|------------------------------|---------------------------|----------|--------------|----|---------------------------------------------|---------------|------------------------------|----------------------------|----------|------------|--------|
| Organism                     | Family                    | Name     | Mutant       | MW | K <sub>d</sub> (nM)                         | Symbol        | Organism                     | Family                     | Name     | Mutant     | MW     |
| <i>B. amylo-liquefaciens</i> | RNase inhibitor           | Barstar  | WT           | 10 | 320 <sup>a</sup>                            | ■             | <i>B. amylo-liquefaciens</i> | RNase                      | Barnase  | H102A      | 12     |
|                              |                           |          | Y29A         | 10 | 420 <sup>a</sup>                            | ▲             |                              |                            |          |            |        |
|                              |                           |          | Y29F         | 10 | 117 <sup>a</sup>                            | ●             |                              |                            |          |            |        |
|                              |                           |          | W38F         | 10 | 4 000 <sup>a</sup>                          | ■             |                              |                            |          |            |        |
|                              |                           |          | D35A         | 10 | 25 000 <sup>h</sup>                         | ●             |                              |                            |          |            |        |
|                              |                           |          | D39A         | 10 | 420 000 <sup>b</sup>                        | ▲             |                              |                            |          |            |        |
| <i>H. sapiens</i>            | GTPase                    | HRas     | G12V & C186A | 21 | 122 000 <sup>c</sup><br>11 000 <sup>d</sup> | ■<br>▲        | <i>H. sapiens</i>            | Kinase                     | CRaf RBD | WT<br>A85K | 9<br>9 |
| <i>H. sapiens</i>            | Kinase regulatory subunit | CksHs1   | WT           | 10 | 77 000 <sup>e</sup>                         | ■             | <i>H. sapiens</i>            | Kinase                     | CDK2     | WT         | 34     |
| <i>E.coli</i>                | β-Lactamase               | TEM      | WT           | 31 | 15 000 <sup>f</sup>                         | ●             | <i>S. clavuligerus</i>       | β-Lactamase inhibitor      | BLIP1    | WT         | 21     |
| <i>HIV1</i>                  | Virulence factor          | Nef      | LAI          | 23 | 11 400 000 <sup>g</sup>                     | ■             | <i>H. sapiens</i>            | Kinase                     | SRC SH3  | WT         | 7      |
| <i>H. sapiens</i>            | Adapter                   | Grb2 SH3 | WT           | 7  | 17 000 000 <sup>i</sup>                     | ◆             | <i>M. musculus</i>           | Nucleotide exchange factor | Vav1 SH3 | WT         | 8      |

<sup>a</sup> ITC, 50mM Tris/HCl, pH 8 at 25°C.<sup>14</sup>

<sup>b</sup> Mean values from two studies<sup>14,15</sup> with ITC, 24mM Hepes, pH 8, 1 mM DTT at 25°C.

<sup>c</sup> Mean values from four studies of Ras G12V (without the membrane anchor): SPR, 50 mM Tris/HCl, pH 7.4, 100mM NaCl, 5 mM MgCl<sub>2</sub>;<sup>16</sup> SPR, 50 mM Tris/HCl, pH 7.4, 100mM NaCl, 5 mM MgCl<sub>2</sub>;<sup>17</sup> SPR, 10 mM Hepes, pH 7.4, 150 mM NaCl, 2 mM MgCl<sub>2</sub>, and 0.01% Nonidet P-40 25°C;<sup>18</sup> ITC, 50 mM Hepes, pH 7.4, 125 mM NaCl, 5 mM MgCl<sub>2</sub>, 25°C.<sup>19</sup>

<sup>d</sup> ITC, 50 mM Hepes, pH 7.4, 125 mM NaCl, 5 mM MgCl<sub>2</sub>, 25°C.<sup>19</sup> The dissociation constant of the CRaf RBD A85K mutant was measured with HRas WT loaded with a GTP-analogue. The mutant HRas G12V is known to decrease the dissociation constant for the interaction with CRaf RBD WT by a factor of 11.<sup>20</sup> The given value applies the same correction factor.

<sup>e</sup> SPR, 10 mM Hepes, 3.4 mM EDTA, 150 mM NaCl, 0.001% surfactant P20, pH 7.4.<sup>21</sup>

<sup>f</sup> SPR, 10 mM Hepes, 3.4 mM EDTA, 150 mM NaCl, 0.05% surfactant P20, pH 7.4.<sup>22</sup>

<sup>g</sup> ITC, 20 mM phosphate buffer, pH 7.5, 150 mM NaCl, 2 mM EGTA, and 5 mM DTT, 25°C.<sup>23</sup>

<sup>h</sup> SPR, 10 mM Hepes-Na, pH 7.4, 0.15 M NaCl, 3 mM EDTA, and 0.005% (v/v) Tween 20, 25 °C.<sup>24</sup>

<sup>i</sup> SPR, 25°C.<sup>25</sup>

<sup>h</sup> Free-energy calculations.<sup>8</sup>

167 **Figure 1.**

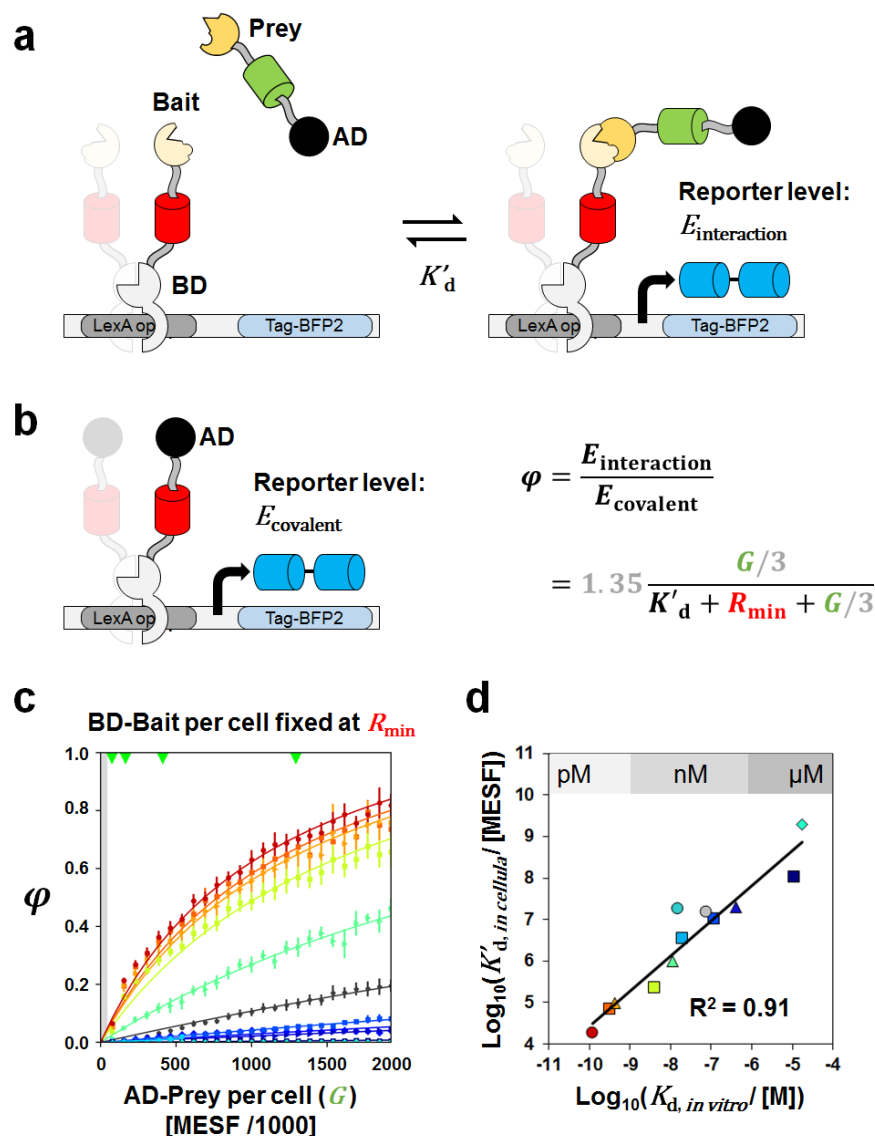

168  
169 **a)** In our qY2H system, red-fluorescent BD-Bait interacts with green-fluorescent AD-Prey to reconstitute a  
170 transcription factor that drives the expression of a blue-fluorescent reporter. Our hypothesis is that the expression  
171 level of the reporter,  $E_{\text{interaction}}$ , reflects the number of BD-molecules bound to the promotor corrected by the  
172 fraction of BD-Bait bound to AD-Prey. This fraction is influenced by the affinity between the Bait and the Prey,  
173 but also by the expression levels of BD-Bait and AD-Prey. **b)** When the activation domain is covalently linked to  
174 the DNA-binding domain, the expression level  $E_{\text{covalent}}$  depends only on the number of BD-Bait molecules bound  
175 the promotor. Thus, when forming the quantity  $\varphi$  by dividing  $E_{\text{interaction}}$  with  $E_{\text{covalent}}$ , we obtain a measure for the  
176 fraction of BD-molecules bound by an AD-Prey molecule. To determine  $E_{\text{covalent}}$ , we constructed a BD-AD fusion  
177 protein. Unfortunately, the activation domain B42 (as used in **a**) turned out to be toxic for our yeast strains when  
178 used in the BD-AD construct. Instead, we used the activation domain B112. Difference in the activation potential  
179 between B42 and B112 are integrated in the parameter  $\beta$  of Eq. 1. **c)** The quantity  $\varphi$  can be monitored as a function  
180 of different levels of EGFP Molecules of Equivalent Soluble Fluorochrome (MESF) corresponding to different  
181 cellular levels of AD-Prey. In these titrations, the level of BD-Bait is kept fixed at the lowest possible value (see  
182 “Methods”). For the interaction TEM/BLIP1 (cyan line) the titration can be preformed only up to one third of the  
183 titrant quantity due to expression problems of AD-BLIP1.<sup>8</sup> Green triangles at the top vertical axis indicate the  
184 position of used calibration beads. **d)** When the titration curves are fitted with Eq. 1, we can extract the dissociation  
185 constant in units of MESF ( $K'_d$ ). The estimated  $K'_d$ -values show a remarkable correlation with the dissociation  
186 constants measured from alternative *in-vitro* experiments (Table 1).  
187



# References

1. Dutta, S., Koide, A. & Koide, S. High-throughput Analysis of the Protein Sequence–Stability Landscape using a Quantitative Yeast Surface Two-hybrid System and Fragment Reconstitution. *J. Mol. Biol.* **382**, 721–733 (2008).
2. Jeong, K. J., Seo, M. J., Iverson, B. L. & Georgiou, G. APEx 2-hybrid, a quantitative protein-protein interaction assay for antibody discovery and engineering. *Proc. Natl. Acad. Sci.* **104**, 8247–8252 (2007).
3. Colas, P., Cohen, B., Ferrigno, P. K., Silver, P. A. & Brent, R. Targeted modification and transportation of cellular proteins. *Proc Natl Acad Sci USA* **97**, 13720–13725 (2000).
4. Hu, X., Kang, S., Chen, X., Shoemaker, C. B. & Jin, M. M. Yeast Surface Two-hybrid for Quantitative *in Vivo* Detection of Protein-Protein Interactions via the Secretory Pathway. *J. Biol. Chem.* **284**, 16369–16376 (2009).
5. Younger, D., Berger, S., Baker, D. & Klavins, E. High-throughput characterization of protein–protein interactions by reprogramming yeast mating. *Proc. Natl. Acad. Sci.* **114**, 12166–12171 (2017).
6. Fields, S. & Song, O. A novel genetic system to detect protein protein interactions. *Nature* **340**, 245–246 (1989).
7. Estojak, J., Brent, R. & Golemis, E. A. Correlation of two-hybrid affinity data with *in vitro* measurements. *Mol. Cell. Biol.* **15**, 5820–5829 (1995).
8. Cluet, D. *et al.* A quantitative tri-fluorescent yeast two-hybrid system: from flow cytometry to *in-cellula* affinities. *Mol. Cell. Proteomics* (2020) doi:10.1074/mcp.TIR119.001692.
9. Li, J. *et al.* Green fluorescent protein in *Saccharomyces cerevisiae*: Real-time studies of the GAL1 promoter. *Biotechnol. Bioeng.* **70**, 187–196 (2000).
10. Bolognesi, B. & Lehner, B. Reaching the limit. *eLife* **7**,.

11. Rajagopala, S. V. & Uetz, P. Analysis of Protein–Protein Interactions Using High-Throughput Yeast Two-Hybrid Screens. in *Network Biology* (eds. Cagney, G. & Emili, A.) vol. 781 1–29 (Humana Press, 2011).
12. Kolonin, M. G., Zhong, J. & Finley, R. L. Interaction mating methods in two-hybrid systems. *Methods Enzymol.* **328**, 26–46 (2000).
13. Gromiha, K. Y. and M. M. Analysis of protein-protein interaction networks based on binding affinity. *Current Protein & Peptide Science* <http://www.eurekaselect.com/135165/article> (2016).
14. Schreiber, G. & Fersht, A. R. Energetics of protein-protein interactions: Analysis of the Barnase-Barstar interface by single mutations and double mutant cycles. *J. Mol. Biol.* **248**, 478–486 (1995).
15. Frisch, C., Schreiber, G., Johnson, C. M. & Fersht, A. R. Thermodynamics of the interaction of barnase and barstar: changes in free energy versus changes in enthalpy on mutation 1 Edited by J. Karn. *J. Mol. Biol.* **267**, 696–706 (1997).
16. Herrmann, C., Horn, G., Spaargaren, M. & Wittinghofer, A. Differential Interaction of the Ras Family GTP-binding Proteins H-Ras, Rap1A, and R-Ras with the Putative Effector Molecules Raf Kinase and Ral-Guanine Nucleotide Exchange Factor. *J. Biol. Chem.* **271**, 6794–6800 (1996).
17. Block, C., Janknecht, R., Herrmann, C., Nassar, N. & Wittinghofer, A. Quantitative structure-activity analysis correlating Ras/Raf interaction in vitro to Raf activation in vivo. *Nat. Struct. Mol. Biol.* **3**, 244–251 (1996).
18. Fischer, A. *et al.* B- and C-RAF display essential differences in their binding to Ras: the isotype-specific N terminus of B-RAF facilitates Ras binding. *J. Biol. Chem.* **282**, 26503–26516 (2007).

19. Kiel, C. *et al.* Improved Binding of Raf to Ras·GDP Is Correlated with Biological Activity. *J. Biol. Chem.* **284**, 31893–31902 (2009).
20. Kiel, C. Untersuchung von Ras/Effektor-Komplexen mit gezielt veränderten elektrostatischen Eigenschaftens. (Dissertation, Ruhr-Universität Bochum, Fachbereich Biochemie, 2003).
21. Bourne, Y. *et al.* Crystal Structure and Mutational Analysis of the Human CDK2 Kinase Complex with Cell Cycle–Regulatory Protein CksHs1. *Cell* **84**, 863–874 (1996).
22. Albeck, S. & Schreiber, G. Biophysical Characterization of the Interaction of the  $\beta$ -Lactamase TEM-1 with Its Protein Inhibitor BLIP<sup>†</sup>. *Biochemistry (Mosc.)* **38**, 11–21 (1999).
23. Arold, S. *et al.* RT Loop Flexibility Enhances the Specificity of Src Family SH3 Domains for HIV-1 Nef<sup>†, ‡</sup>. *Biochemistry (Mosc.)* **37**, 14683–14691 (1998).
24. Sato, Y. *et al.* Characterization of the Interaction between Recombinant Human Peroxin Pex3p and Pex19p: IDENTIFICATION OF TRP-104 IN Pex3p AS A CRITICAL RESIDUE FOR THE INTERACTION. *J. Biol. Chem.* **283**, 6136–6144 (2008).
25. Nishida, M. Novel recognition mode between Vav and Grb2 SH3 domains. *EMBO J.* **20**, 2995–3007 (2001).
